# Supplementary material for: Biphasic Calcium Phosphate and Activated Carbon Microparticles in a Plasma Clot for Bone Reconstruction and In Situ Drug Delivery: A Feasibility Study
Source: MDPI journal article supplement (doi:10.3390/ma17081749), 2024-04-11
Supplement: s1 [file s1]

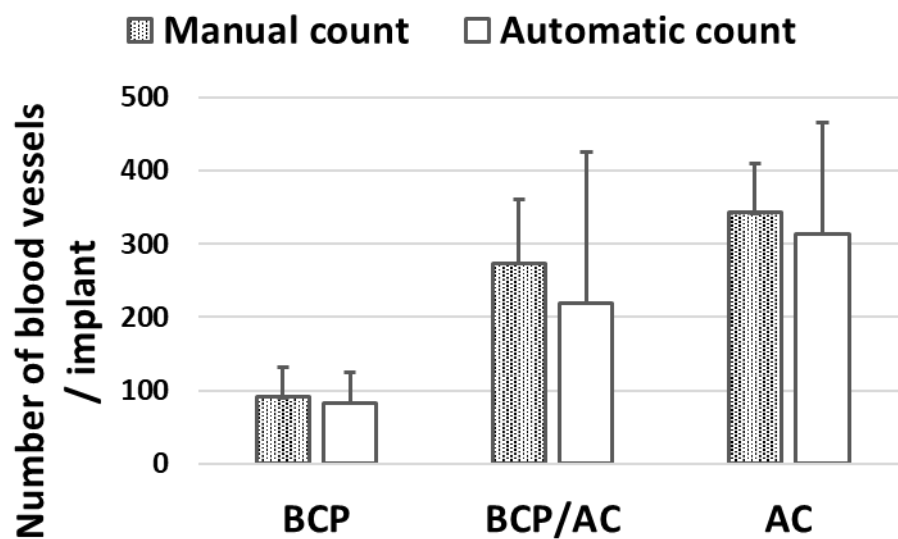

**Figure S1.** Quantification of blood vessel number from histological sections either by manual counting (grey histogram) or by automatic counting (white histogram) for the three biomaterials.

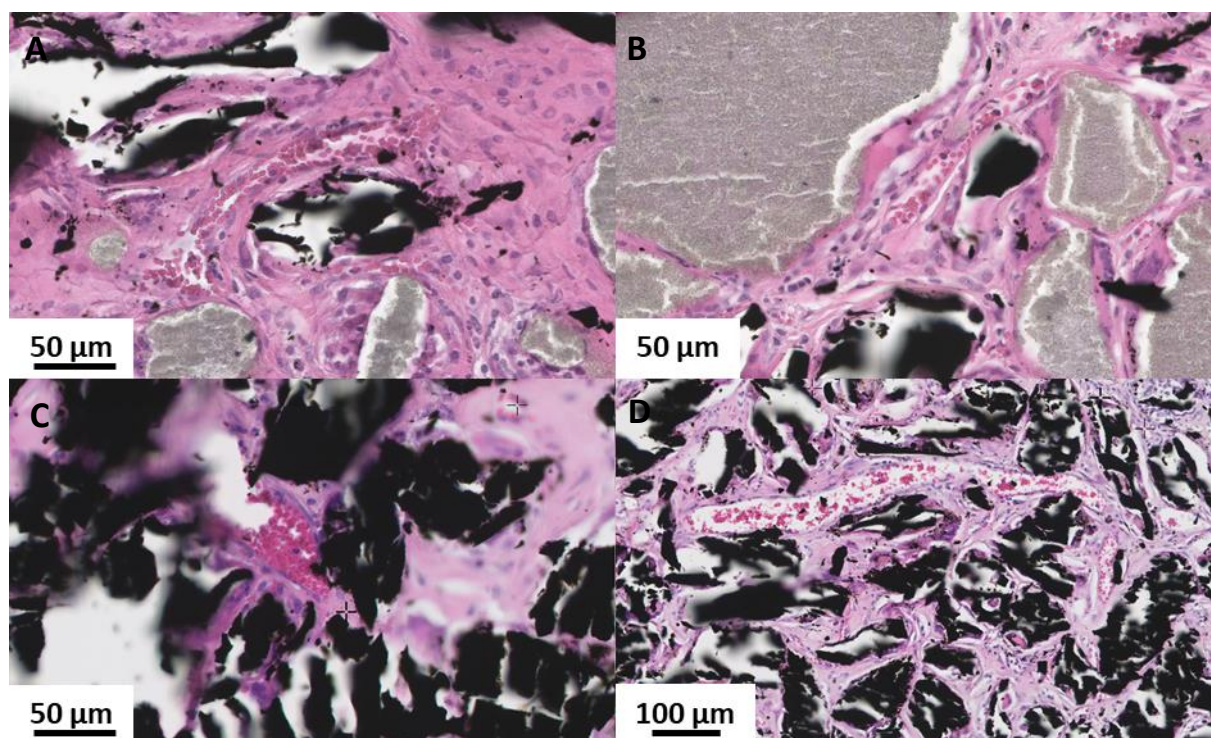

**Figure S2.** Light microscopy pictures of: (A) BCP/AC - [NaCl]; (B) BCP/AC - [EtOH]; (C) AC - [NaCl] and (D) AC - [EtOH] composites.
